# Supplementary material
Source: Springer Nature journal article supplement (https://www.springermedizin.de/resource/supplementary/12958_2011_937_MOESM3_ESM.pdf/9566404)

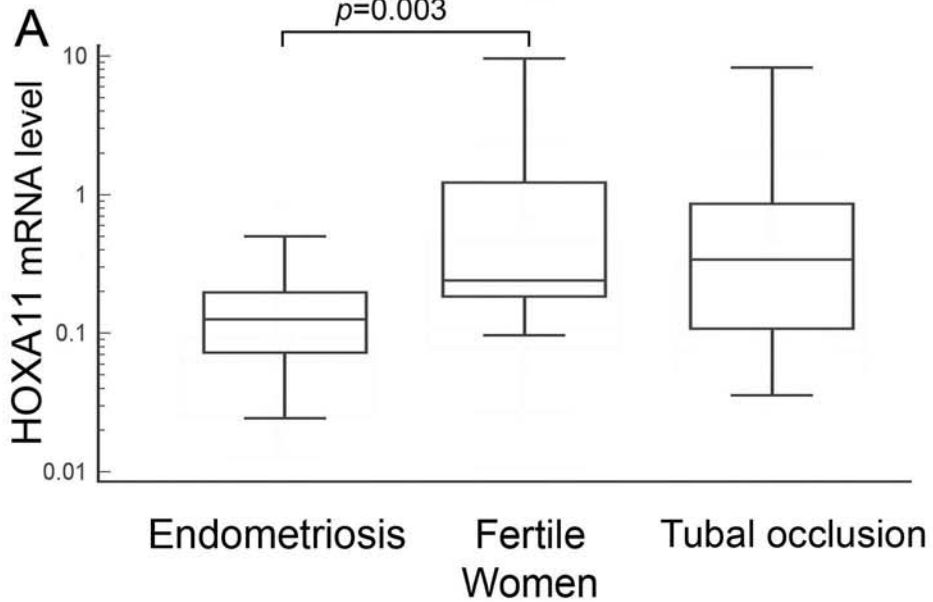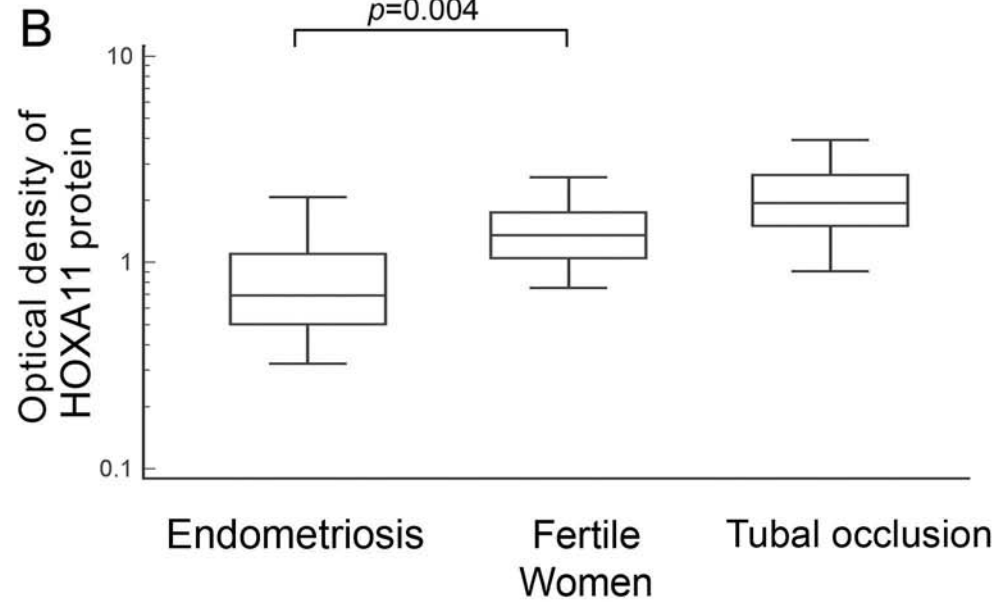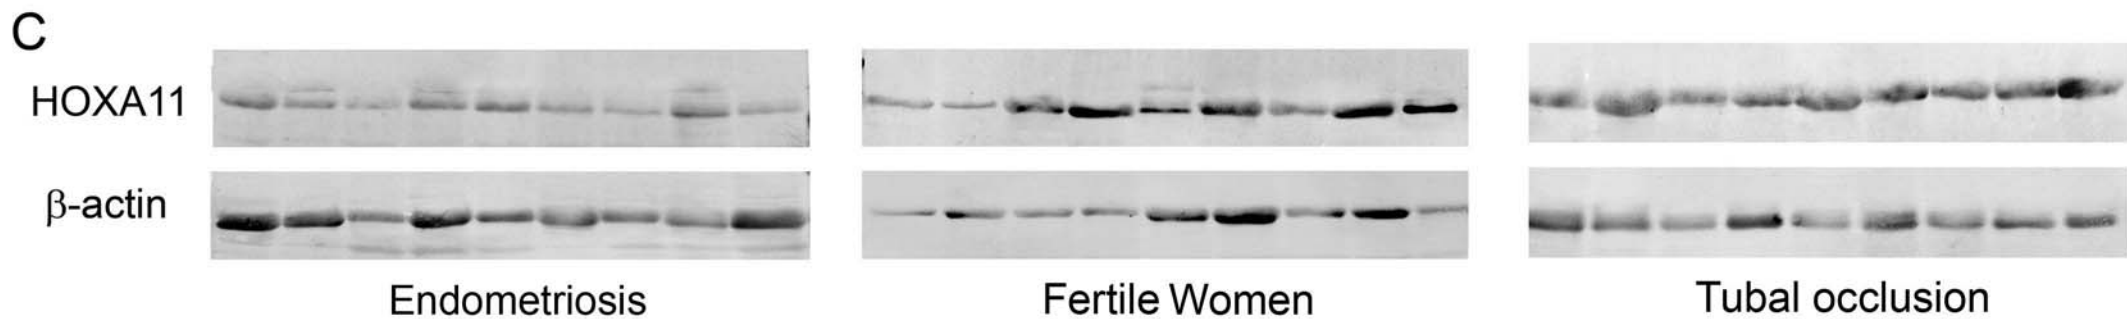

Supplement: MOESM3 [file 9566404]
